# Supplementary material for: Evaluation of the Impact of Changing from Rainfed to Irrigated Agriculture in a Mediterranean Watershed in Spain
Source: MDPI journal article supplement (doi:10.3390/agriculture13010106), 2022-12-30
Supplement: s1 [file s1]

**Table S1:** Supplementary information on the area of cultivated crops, irrigation water consumption, and crop yield

| Crops planted | Percentage of cultivated area (%) | Annual irrigation water consumption (mm) | Annual Crop yield (100 kg ha <sup>-1</sup> ) |
|---------------|-----------------------------------|------------------------------------------|----------------------------------------------|
| Wheat/Barley  | 60                                | Rainfed                                  | > 50                                         |
| Corn          | 18                                | 700 - 800                                | 90 - 110                                     |
| Tomato        | 8                                 | 550 - 650                                | 500 - 550                                    |
| Broccoli      | 5                                 | 200 - 250                                | 110 - 120                                    |
| Peas/Beans    | 4                                 | 300 - 400                                | 10 - 20                                      |
| Onions        | 2                                 | 700 - 800                                | 500 - 550                                    |
